# Supplementary material for: TR4 Nuclear Receptor Alters the Prostate Cancer CD133+ Stem/Progenitor Cell Invasion via Modulating the EZH2-Related Metastasis Gene Expression
Source: Oxford University Press journal article supplement (doi:10.1158/1535-7163.mct-14-0971), 2015-04-02
Supplement: 15357163mct140971-sup-140723_1_supp_2828774_nph6pp.docx [file 15357163mct140971-sup-140723_1_supp_2828774_nph6pp.docx]

**Fig. S1. Quantitation for Western Blot data.**

**A.** Quantitation for Fig. 1C/D. **B.** Quantitation for Fig. 2A/D. **C.** Quantitation for Fig. 3D. **D.** Quantitation for Fig. 5A.

**Fig. S2. Morphology change of C4-2 S/P cells transfected with TR4 shRNA.**

C4-2 CD133+ S/P cells with TR4 knock down (B) showed morphology change to more differentiated PCa cells than control group (A).

**Table. S1. 30 metastasis-related genes used for screening.**
